# Supplementary material for: Selectivity of aliphatic alcohols by host–guest chemistry
Source: Royal Society of Chemistry journal article supplement (doi:10.1039/c7ce00736a), 2017-01-01
Supplement: c7ce00736a1.pdf [file c7ce00736a1.pdf]

## Electronic Supplementary Information

### Selectivity of Aliphatic Alcohols by Host-Guest Chemistry

Nicole M. Sykes, Hong Su, Edwin Weber, Susan A. Bourne and Luigi R. Nassimbeni

#### Table of Contents

|                                                                   |   |
|-------------------------------------------------------------------|---|
| 1. CSD analysis of 9,9'-(ethyne-1,2-diyl)-bis(fluoren-9-ol) ..... | 1 |
| 2. ORTEP and Packing Figures.....                                 | 2 |
| 3. Apohost polymorph DSC.....                                     | 3 |
| 4. DFT calculation .....                                          | 4 |
| 5. Hirshfeld Analysis.....                                        | 5 |

#### 1. CSD analysis of 9,9'-(ethyne-1,2-diyl)-bis(fluoren-9-ol)

| Guest                    | REFCODE  | Reference                                                                                                       |
|--------------------------|----------|-----------------------------------------------------------------------------------------------------------------|
| 2,6-dimethylpiperidine   | CANFUV   | N. M. Sykes, H. Su, E. Weber, S. A. Bourne and L. R. Nassimbeni, <i>Cryst. Growth Des.</i> , 2017, 17, 819-826. |
| 2-methylpiperidine       | CANGC    |                                                                                                                 |
| 3,5-methylpiperidine     | CANGEG   |                                                                                                                 |
| 3-methylpiperidine       | CANGIK   |                                                                                                                 |
| 4-methylpiperidine       | CANGOQ   |                                                                                                                 |
| 2-picoline               | CISPEA   | L. R. Nassimbeni, G. Ramon and E. Weber, <i>J. Therm. Anal. Cal.</i> , 2007, 90, 31-37.                         |
| 3-picoline               | CISPIE   |                                                                                                                 |
| 4-picoline               | CISPOK   |                                                                                                                 |
| Pyridine                 | CISPUQ   |                                                                                                                 |
| Acetonitrile and water   | DEZBOA   | T. le Roux, L. R. Nassimbeni and E. Weber, <i>Chem. Commun.</i> , 2007, 1124-1126.                              |
| Ethanol                  | DEZBUG   |                                                                                                                 |
| Ethanol and acetonitrile | DEZCAN   |                                                                                                                 |
| Ethanol and acetonitrile | DIFDEC   |                                                                                                                 |
| Ethanol and acetonitrile | DIFDIG   |                                                                                                                 |
| Acetonitrile and water   | DEZBOA01 | T. le Roux, L. R. Nassimbeni and E. Weber, <i>New J. Chem.</i> , 2008, 32, 856-863.                             |
| Acetonitrile             | ROBGAR   |                                                                                                                 |
| Ethanol                  | DEZBUG01 |                                                                                                                 |
| Acetonitrile and water   | DEZCAN01 |                                                                                                                 |
| Ethanol and Acetonitrile | DIFDEC01 |                                                                                                                 |
| Ethanol and Acetonitrile | DIFDIG01 |                                                                                                                 |
| Ethanol                  | GIZPOV   |                                                                                                                 |

|                                   |                  |                                                                                                                  |
|-----------------------------------|------------------|------------------------------------------------------------------------------------------------------------------|
| 1-propanol                        | IFAHOM           | E. Weber, S. Nitsche, A. Wierig, I. Csoregh;<br><i>Eur.J.Org.Chem</i> , 2002, 856                                |
| Cyclohexanol<br>Tetrahydrofuran   | IFHAUS<br>IFAJAA |                                                                                                                  |
| 9H-fluoren-9-one                  | QIZLES           | J. Gabriel Garcia, F. R. Fronczek; Private<br>Communication (2014)                                               |
| 9H-fluoren-9-one                  | QIZLES01         | Varshni Singh, F. R. Fronczek, S. F. Watkins; Private<br>Communication (2012)                                    |
| Caffeine                          | UPIWAS           | A. Jacobs, L. Nassimbeni, K. L. Nohako, G. Ramon, B.<br>K. Sebogisi; <i>J.Chem.Cryst</i> , 2011, <b>41</b> , 610 |
| Caffeine and Methanol<br>Methanol | UPIWEW<br>UPIWIA |                                                                                                                  |

## 2. ORTEP and Packing Figures

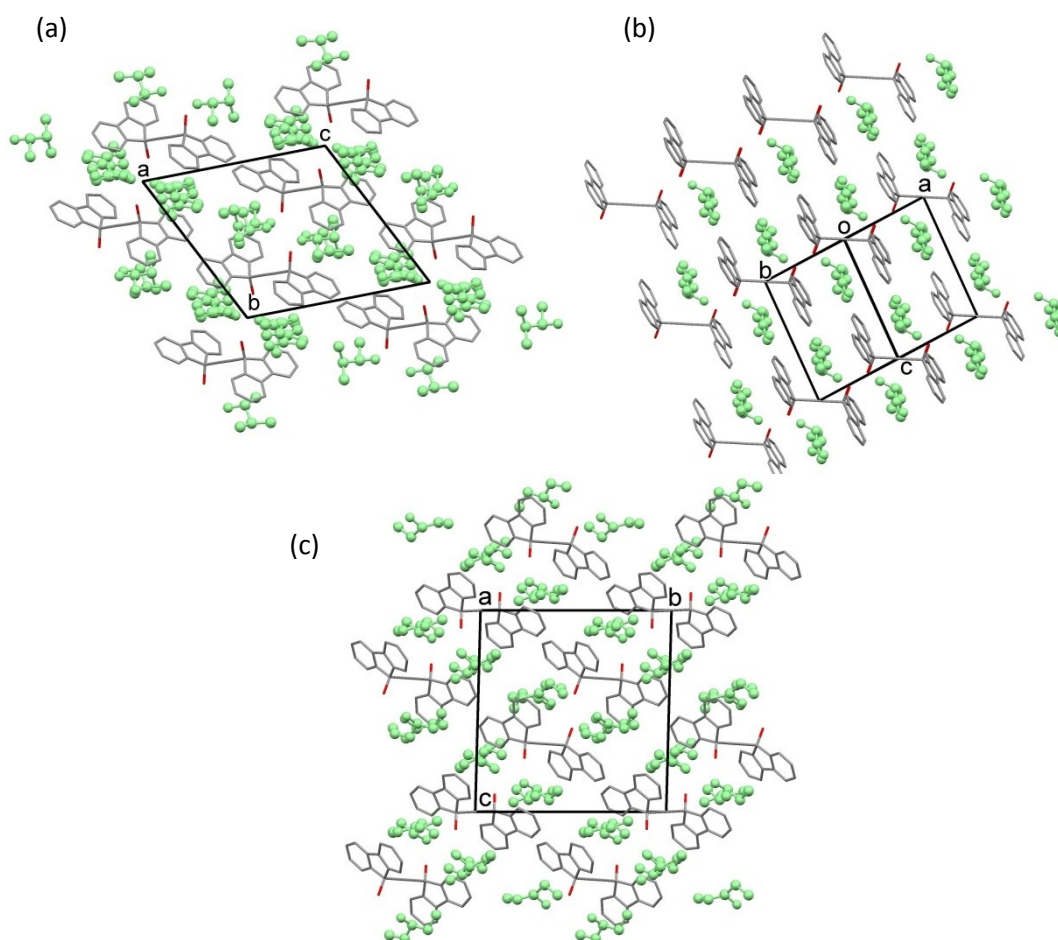

The packing of (a) **H·2(3MBUT)** viewed down [100] (b) **H·2(2PENT)** and (c) **3H·6(3PENT)** viewed down [100], with guest atoms shown in green.

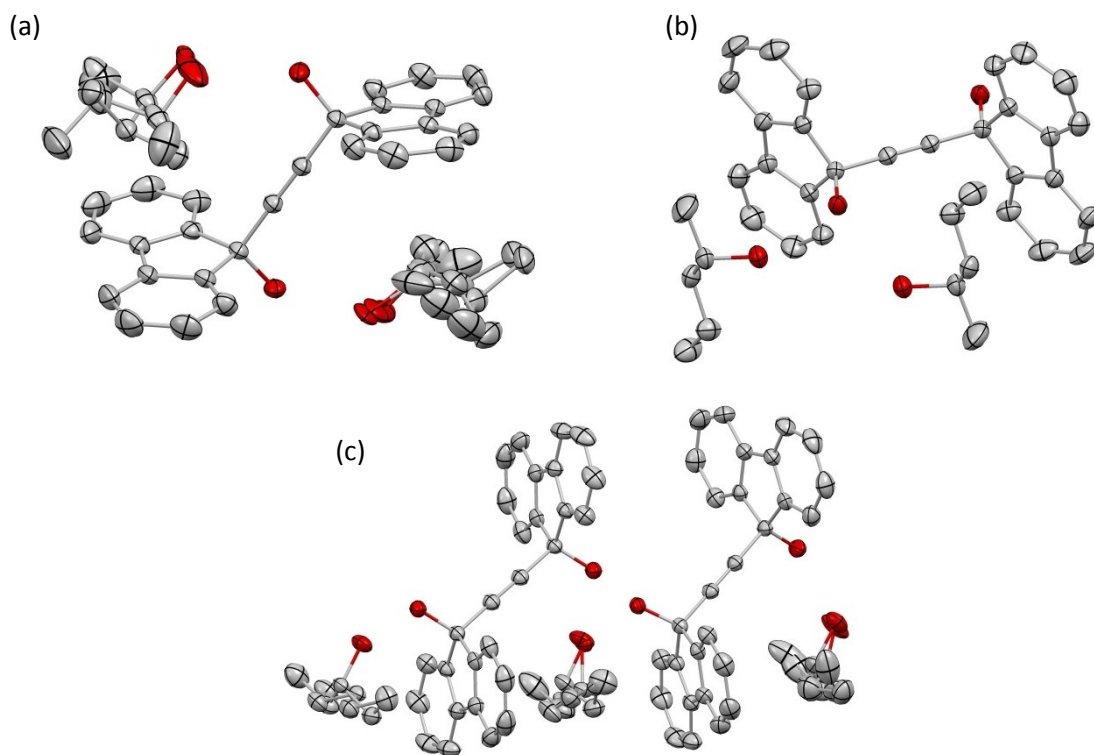

ORTEP diagrams of (a) **H·2(3MBUT)** (b) **H·2(2PENT)** and (c) **3H·6(3PENT)**

### 3. Apohost polymorph DSC

DSC traces of **Apohost( $\alpha$ )** (red), **Apohost( $\beta$ )** (green) and **H** as received from Professor Edwin Weber (blue).

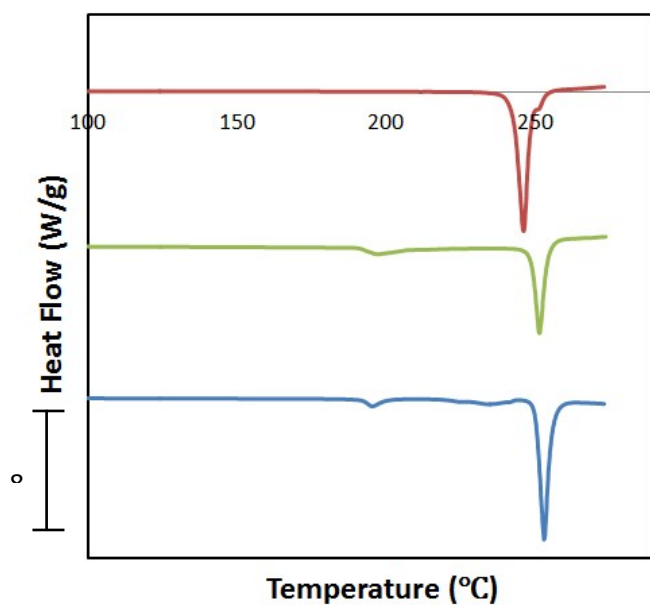

#### 4. DFT calculation

Relaxed potential energy scans were computed using density functional theory (DFT), employing the B3LYP hybrid exchange-correlation functional<sup>1-3</sup> and the def2-SVP basis set.<sup>4</sup> Dispersion effects were taken into account by adding the D3 correction of Grimme, with Becke-Johnson (BJ) dampening.<sup>5,6</sup> This level of theory is denoted B3LYP-D3/def2-SVP. The Gaussian 09 package was used.<sup>7</sup>

#### References

1. A. D. Becke. *J. Chem. Phys.* 1993, **98**, 5648.
2. C. Lee, W. Yang, R. G. Parr. *Phys. Rev. B.* 1988, **37**, 785-789.
3. P. J. Stephens, F. J. Devlin, C. F. Chabalowski, M. J. Frisch. *J. Phys. Chem.* 1994, **98**, 11623-11627.
4. F. Weigend, R. Ahlrichs. *Phys. Chem. Chem. Phys.* 2005, **7**, 3297-3305.
5. S. Grimme, J. Antony, S. Ehrlich, H. Krieg. *J. Chem. Phys.* 2010, **132**, 154104.
6. S. Grimme, S. Ehrlich, L. Goerigk. *J. Comput. Chem.* 2011, **32**, 1456-1465.
7. M. J. Frisch, G. W. Trucks, H. B. Schlegel, G. E. Scuseria, M. A. Robb, J. R. Cheeseman, G. Scalmani, V. Barone, B. Mennucci, Petersson, G. A.; Nakatsuji, H.; Caricato, M.; X. Li.; H. P. Hratchian, A. F. Izmaylov, J. Bloino, G. Zheng, J. L. Sonnenberg, M. Hada, M. Ehara, K. Toyota, R. Fukuda, J. Hasegawa, M. Ishida, T. Nakajima, Y. Honda, O. Kitao, H. Nakai, T. Vreven, J. A. Jr. Montgomery, J. E. Peralta, F. Ogliaro, M. Bearpark, J. J. Heyd, E. Brothers, K. N. Kudin, V. N. Staroverov, R. Kobayashi, J. Normand, K. Raghavachari, A. Rendell, J. C. Burant, S. S. Iyengar, J. Tomasi, M. Cossi, N. Rega, J. M. Millam, M. Klene, J. E. Knox, J. B. Cross, V. Bakken, C. Adamo, J. Jaramillo, R. Gomperts, R. E. Stratmann, O. Yazyev, A. J. Austin, R. Cammi, C. Pomelli, J. W. Ochterski, R. L. Martin, K. Morokuma, V. G. Zakrzewski, G. A. Voth, P. Salvador, J. J. Dannenberg, S. Dapprich, A. D. Daniels, Ö. Farkas, J. B. Foresman, J. V. Ortiz, J. Cioslowski, D. J. Fox. Gaussian 09, Revision D.01, Gaussian, Inc.: Wallingford CT, 2009.

## 5. Hirshfeld Analysis

Host selected as target in all cases

### Apohost( $\alpha$ )

|      | Out % |      |     |
|------|-------|------|-----|
| In % | C     | H    | O   |
| C    | 6.8   | 20.5 | 0   |
| H    | 16.3  | 46.9 | 4.2 |
| O    | 0     | 5.3  | 0   |

### Apohost( $\beta$ ) *cis*-

|      | Out % |      |     |
|------|-------|------|-----|
| In % | C     | H    | O   |
| C    | 5.2   | 21.9 | 0.2 |
| H    | 20.2  | 46.3 | 1.5 |
| O    | 0     | 4.8  | 0   |

### Apohost( $\beta$ ) *trans*-

|      | Out % |      |      |
|------|-------|------|------|
| In % | C     | H    | O    |
| C    | 9.2   | 18.1 | 0.1  |
| H    | 8.5   | 48.9 | 10.2 |
| O    | 0.4   | 4.6  | 0    |

### H-2(3MBUT)

|      | Out % |      |     |
|------|-------|------|-----|
| In % | C     | H    | O   |
| C    | 0     | 27.2 | 0.1 |
| H    | 2.5   | 62.1 | 4.0 |
| O    | 0     | 4.2  | 0   |

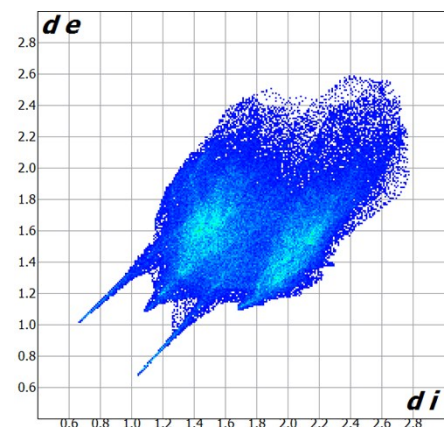

**3H·6(3PENT) trans-**

|      | Out % |      |     |
|------|-------|------|-----|
| In % | C     | H    | O   |
| C    | 0     | 26.4 | 0   |
| H    | 3.7   | 60.3 | 3.8 |
| O    | 0     | 5.3  | 0   |

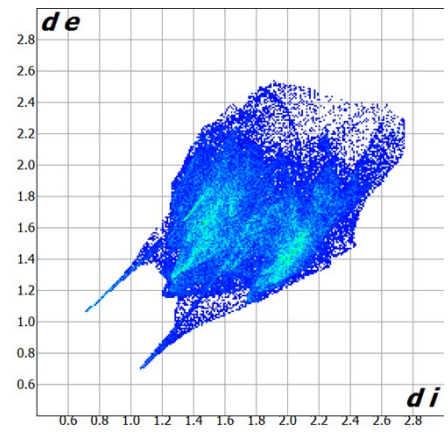**3H·6(3PENT) gauche-**

|      | Out % |      |     |
|------|-------|------|-----|
| In % | C     | H    | O   |
| C    | 0     | 27.4 | 0   |
| H    | 2.9   | 60.7 | 3.9 |
| O    | 0     | 5.1  | 0   |

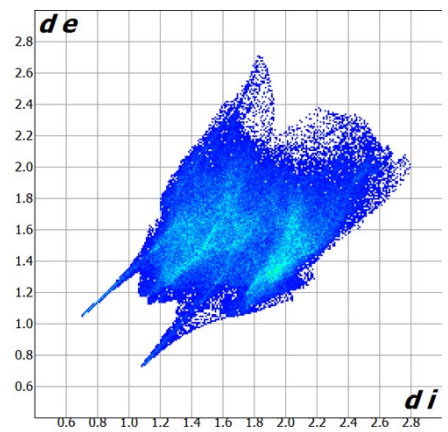**H·2(2PENT)**

|      | Out % |      |     |
|------|-------|------|-----|
| In % | C     | H    | O   |
| C    | 0     | 26.8 | 0   |
| H    | 2.0   | 62.8 | 3.9 |
| O    | 0     | 4.5  | 0   |

**H·2(1BUT)**

|      | Out % |      |     |
|------|-------|------|-----|
| In % | C     | H    | O   |
| C    | 0.8   | 27.0 | 0   |
| H    | 7.4   | 55.8 | 4.4 |
| O    | 0     | 4.7  | 0   |
